# Supplementary material for: Expression of P2 nucleotide receptors varies with age and sex in murine brain microglia
Source: PubMed Central journal article supplement (PMC2744668; doi:10.1186/1742-2094-6-24), 2009-08-25

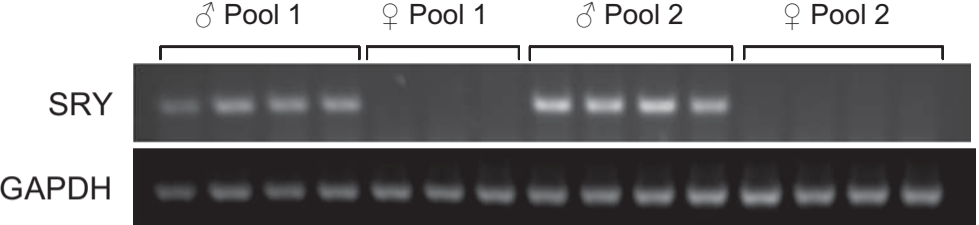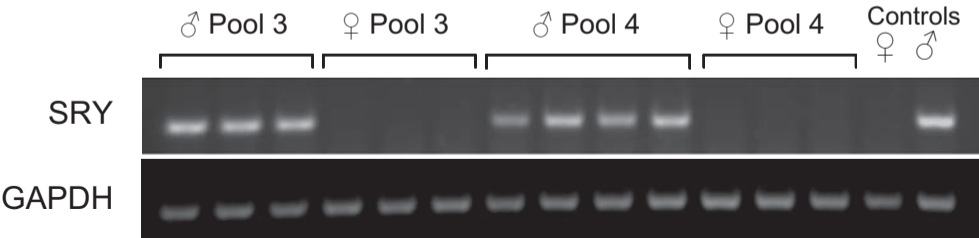

Supplement: 1742-2094-6-24-S1.pdf [file 1742-2094-6-24-S1.pdf]
